# Supplementary material for: An assessment of equatorial Atlantic interannual variability in OMIP simulations
Source: Copernicus journal article supplement (doi:10.5194/egusphere-2024-134), 2024-01-18
Supplement: Supplementary file [file egusphere-2024-134-AC1-supplement.pdf]

1 **Response to reviewers' comments for "An assessment of equatorial Atlantic**  
2 **interannual variability in OMIP simulations".**

3 We thank the reviewer for their comments and suggestions that helped to improve the  
4 manuscript. Please find our detailed responses below. The reviewer comments are in black  
5 and our answers in blue. **When line numbers are given, they refer to the revised manuscript**  
6 **with track changes accepted.**

7

8 This paper focuses on the evaluation of the realism of the seasonal and interannual  
9 variabilities in the Atlantic equatorial band (3°S-3°N) as simulated by some global ocean  
10 models in the context of the Ocean Model Intercomparison Project Phases 1 (OMIP1) and 2  
11 (OMIP2). The two exercises differ in the surface forcing, i.e. CORE-II for OMIP1 and JRA55-do  
12 for OMIP2. Ensemble means are computed using 6 models for OMIP1 and 7 models for  
13 OMIP2, and analyses are performed over a 20-year period (1985-2004). The authors report  
14 classical biases in the ocean mean state for OMIP1 and OMIP2 and highlight a drastically  
15 reduced interannual variability in OMIP2 (compared to OMIP1) in SSH, SST, and subsurface  
16 temperature. Using model experiments with the GFDL-MOM5 model, they attribute the  
17 differences between OMIP1 and OMIP2 interannual variability to surface wind forcing.

18 **General comments:**

19 This paper is useful for the modeling community and for the improvement of ocean models.  
20 The figures are of good quality and the writing is good. However, the paper could be  
21 significantly improved. In particular:

22 - The introduction needs to be entirely revised. The actual introduction is based on the  
23 analysis of 4 figures (Figures 1 and 2, and Figures S1 and S2) that are already part of the  
24 paper's results. On the other hand, the forced and coupled dynamics of the equatorial Atlantic  
25 are hardly explained. One can also wonder why it is important to document the equatorial  
26 Atlantic interannual variability. Specific questions seem to be thrown at the end of the  
27 introduction. 1) Why analyzing the seasonal cycle, knowing that the paper focuses on the  
28 interannual variability? 2) Analyzing the difference in interannual variability between OMIP1

29 and OMIP2: we already know that OMIP2 lacks variability, it has been diagnosed in Figures 2,  
30 S1, and S2. 3) Does the interannual variability depend on the atmospheric forcing used?: This  
31 is a rhetorical question because OMIP1 and OMIP2 differ only in their atmospheric forcing  
32 (see your own comment at line 425).

33 We thank the reviewer for their suggestions to improve the introduction of our manuscript.  
34 Following reviewer's comments, we have largely modified the introduction based on the  
35 following points:

- 36 ● We have removed the paragraph referring to Figures 1, 2 and S1, S2. Figure 1 has been  
37 moved to the discussion section and the panels showing the OMIP1 and OMIP2  
38 ensemble means of the standard deviation of the MJJ-averaged SSTA in Figure 2 have  
39 been removed. Figure S1 has also been removed.
- 40 ● To motivate the study of the equatorial Atlantic variability, we have added to the  
41 introduction potential impacts of the equatorial Atlantic interannual variability on the  
42 onset of the West African Monsoon (L24-25), on El Niño/ Southern Oscillation, on the  
43 local chlorophyll-a concentration, on the Indian Monsoon and European climate. L42-  
44 46.
- 45 ● To motivate the analysis of the monthly climatology of zonal winds, SLAs and SSTs we  
46 have highlighted the strong link between the equatorial Atlantic monthly climatology  
47 and the equatorial Atlantic interannual variability as shown by Prodhomme et al.  
48 (2019). L51-53

49 Prodhomme, C., Voldoire, A., Exarchou, E., Deppenmeier, A.-L., García-Serrano, J., and  
50 Guemas, V.: How Does the Seasonal Cycle Control Equatorial Atlantic Interannual Variability?,  
51 *Geophysical Research Letters*, 46, 916–922,  
52 <https://doi.org/10.1029/2018GL080837>, 2019.

53 - It would be very nice if the authors could use the data from the PIRATA buoy network to  
54 assess the monthly climatological state of the ocean models. Depending on the availability of  
55 observations, the authors could also assess the realism of the interannual temperature  
56 variability in OMIP1 and OMIP2 using PIRATA data.

57 We agree with the reviewer that including the PIRATA data to the study would be very  
58 informative. However, given our study period, 1985/01 to 2004/12, relatively little data is  
59 available from the PIRATA. In numbers, the percentage of monthly mean zonal wind, dynamic  
60 height and SST data available from the PIRATA moorings in the equatorial Atlantic over the  
61 period 1985/01-2004/12 is provided in Table R1.

|      | Uwind at 4 m height | Dynamic height | SST            |
|------|---------------------|----------------|----------------|
| 35°W | 83/240 ≈ 34.6%      | 83/240 ≈ 34.6% | 83/240 ≈ 34.6% |
| 23°W | 65/240 ≈ 27.1%      | 70/240 ≈ 29.2% | 70/240 ≈ 29.2% |
| 10°W | 88/240 ≈ 36.7%      | 88/240 ≈ 36.7% | 71/240 ≈ 29.6% |
| 0°E  | 83/240 ≈ 34.6%      | 83/240 ≈ 34.6% | 83/240 ≈ 34.6% |

62 Table R1. Availability of zonal wind at 4 m height, dynamic height and SST at different mooring  
63 sites over the period from January 1985 to December 2004.

64 The limited amount of available data over the period 1985/01-2004/12 is mainly due to the  
65 fact that the PIRATA program started in the late-1990's. Yet, we have replicated Figure 2 from  
66 the revised manuscript using the available data of zonal wind at 4 m height, dynamic height  
67 and SST from the PIRATA buoy network, as depicted in Figure R1.

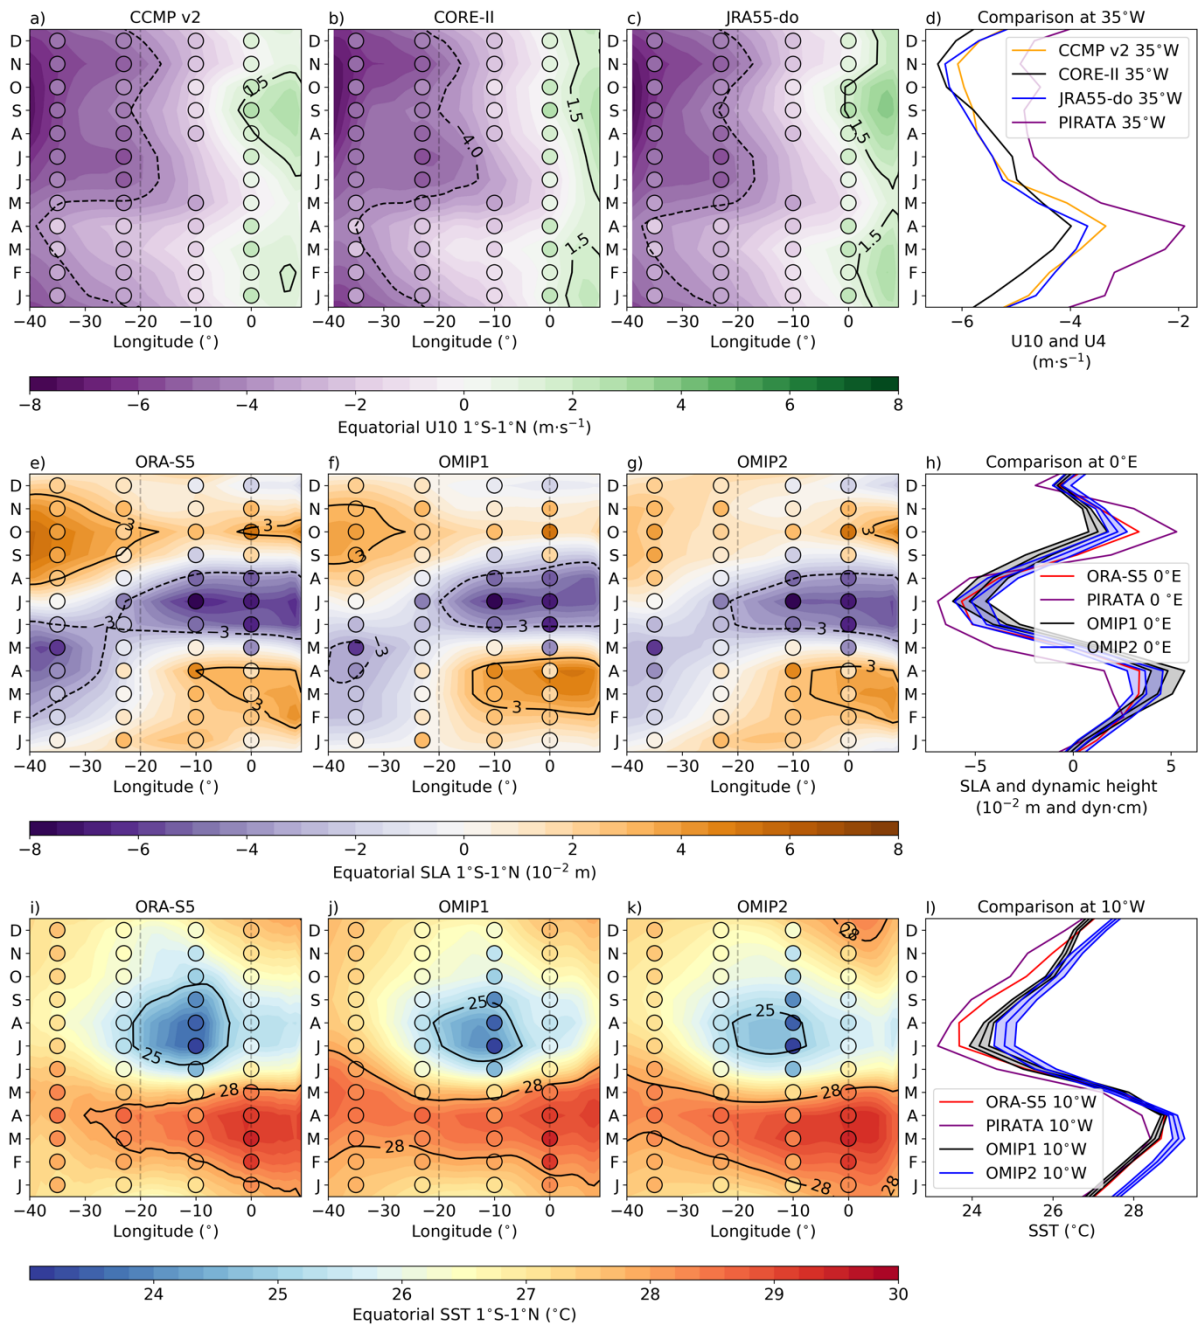

68

69 *Figure R1. Hovmöller diagrams of monthly climatologies for equatorial Atlantic U10, SLA, and*  
 70 *SST. (a) Monthly climatology of CCMP v2 U10, averaged between 1°S and 1°N, presented as a*  
 71 *function of longitude and calendar month for the period January 1987 to December 2004. (b,*  
 72 *c) Same as (a), but for CORE-II and JRA55-do U10 over the period January 1985 to December*  
 73 *2004. In (a, b, c) monthly climatologies derived using equatorial PIRATA mooring data at*  
 74 *35°W, 23°W, 10°W, and 0°E over the period from January 1985 to December 2004 are shown*  
 75 *by colored dots. (d) Monthly climatologies of the zonal wind at 35°W, 0°N and at 10m height*  
 76 *from CCMP v2 (orange), CORE-II (black), and JRA55-do (blue) and measured at 4 m height from*

77 *the 35°W PIRATA mooring (purple). (e, f, g) Monthly climatologies of SLA in ORA-S5, OMIP1*  
78 *ensemble mean, and OMIP2 ensemble mean, averaged between 1°S and 1°N, shown as a*  
79 *function of the longitude and calendar month for the period from January 1985 to December*  
80 *2004. In (e, f, g) monthly climatologies of dynamic height derived using equatorial PIRATA*  
81 *mooring data at 35°W, 23°W, 10°W, and 0°E over the period from January 1985 to December*  
82 *2004 are shown by colored dots. (h) Monthly climatologies of the SLA at 0°E, 0°N from ORA-*  
83 *S5 (red), OMIP1 (black), OMIP2 (blue) and dynamic height from the 0°E PIRATA mooring*  
84 *(purple). (i, j, k) Same as (e, f, g) but for the SST. (l) Monthly climatologies of SST at 10°W, 0°N*  
85 *from ORA-S5 (red), OMIP1 (black), OMIP2 (blue) and from the 10°W PIRATA mooring of*  
86 *(purple).*

87 Figures R1a-c show that the monthly climatology of zonal winds from CCMP-V2, CORE-II, and  
88 JRA55-do in the equatorial Atlantic align closely with the PIRATA data in terms of phasing.  
89 Figure R1d indicates that the zonal wind recorded at the 35°W PIRATA mooring is generally  
90 weaker compared to the reanalysis products throughout the year. This could be due to the  
91 fact that PIRATA wind measurements are taken at 4 m height, while the reanalysis products  
92 deliver data at 10 m height. Figures R1e-h depict that the OMIP1 and OMIP2 ensemble means  
93 accurately capture both the phasing and amplitude of the monthly climatology of SLA in the  
94 equatorial Atlantic. Similarly, Figures R1i-k illustrate that the phasing and amplitude of the  
95 monthly climatology of SST in the equatorial Atlantic are well represented by ORA-S5, OMIP1,  
96 and OMIP2 ensemble means. Finally, Figure R1l shows that the monthly climatology of SST  
97 from OMIP1 and OMIP2 ensemble means at 10°W, 0°N closely resembles that from the  
98 PIRATA mooring at 10°W, however, with a warm bias.

99 We have included Figure R1, and its discussion, as Figure S10 in supplementary Text S2 of the  
100 revised version.

101

102 - The model experiments carried out with the GFDL-MOM5 model (Section 5) are not very  
103 informative, knowing that the seasonal and interannual variability in the equatorial Atlantic  
104 is mostly linear. If the model uses classical bulk formulations (this information is not given in  
105 the manuscript), then the prescribed surface winds control many aspects of the surface

106 forcing (wind stress, latent, and sensible heat, evaporation). In particular, the model  
107 sensitivity experiment (MOM-LR-winds) designed to analyze the role of the surface winds on  
108 the interannual variability does not allow to disentangle the momentum forcing from the heat  
109 and freshwater forcing, which is a weakness for the interpretation of the results.  
110 Furthermore, the use of bulk formulae to estimate the surface wind stress is accompanied by  
111 a drastic dependence of the wind stress amplitude on the climatological SST (see how the  
112 drag coefficient is estimated in the model), which again limits the interpretation of the  
113 difference between MOM-LR and MOM-LR-winds. An additional experiment could be run  
114 with the GFDL-MOM5 model to analyze the effect of changes in the mean state on the  
115 interannual variability. I suggest running MOM-LR forced by climatological winds / wind stress  
116 from CORE-II and the anomalies from JRA55-do. Or test the role of the forcing off the  
117 equatorial band, as compared to the local equatorial forcing.

118 The experiment MOM5-LR-winds was designed to test the sensitivity of the equatorial  
119 Atlantic interannual variability to different wind forcing. Our aim, undoubtedly with a crude  
120 setting, was intentionally not to separate the effect of the prescribed wind on different  
121 surface forcing. As such, MOM5-LR-winds did provide a test for the difference in the  
122 equatorial Atlantic interannual variability between OMIP1 and OMIP2, which we concluded  
123 arises primarily from the wind forcing. However, following the reviewer's suggestion, we have  
124 replaced the MOM5-LR-winds experiment with a new experiment, MOM5-LR-anom, which is  
125 forced by climatological winds from JRA55-do and monthly anomalies from CORE-II.  
126 Comparing MOM5-LR to MOM5-LR-anom in the revised manuscript has enabled us to observe  
127 more clearly the impact of the wind variability from the CORE-II forcing on the equatorial  
128 Atlantic interannual variability.

129 - Note that the seasonal cycle is the seasonal deviation relative to the ocean mean state. For  
130 this study, the authors have to (estimate and) refer to the monthly climatology, which, in  
131 contrast, does contain the long-term mean.

132 We refer now to monthly climatology instead of seasonal cycle where applicable throughout  
133 the manuscript.

134 **Specific comments:**

135        1. **Introduction:**

136 **Fig.1:** Caption mentions anomalies, are these interannual anomalies? If yes, improve the  
137 caption and clearly state that you are describing interannual variability in **Lines 17-20**. Note  
138 that in many studies such as in M. Martìn-Rey’s work, they do not only remove the linear  
139 trend, but they remove the 7-yr low-frequency component (using fft).

140 In Figure 1 of the submitted manuscript the monthly mean SST anomalies without any filtering  
141 were considered. We have added “monthly mean” anomalies in the caption of Figure 10 of  
142 the revised manuscript. In Figure 10 we do not want to consider only the interannual SST  
143 variability as we also want to show the SST variability occurring at higher frequency like in  
144 eddy-rich regions like the Gulf Stream, Kuroshio, Malvinas and Agulhas currents as well as in  
145 eastern boundary upwelling systems.

146 **Fig.1:** The boxes can be removed. Also, NINO3.4 is not used in the article.

147 The boxes have been removed in Figure 10 of the revised manuscript (which was Figure 1 of  
148 the submitted manuscript).

149 **L27:** You could replace Dakar with Senegal to have two country names.

150 We have removed this sentence in the revised manuscript.

151 **L28:** “Discrepancies” should be replaced by differences.

152 This sentence has been removed in the revised manuscript.

153 **L45:** ENSO acronym has already been defined (and is used only twice in the paper).

154 We have removed the ENSO acronym as it was used only twice.

155 **L55:** There is an unnecessary closing bracket.

156 We thank the reviewer for spotting that. The extra closing bracket has been removed.

157 **L64:** “was comparable”, do you mean that the magnitude was comparable?

158 Indeed, what is meant is that the magnitude of the ocean temperature variability was  
159 comparable. We have modified this sentence L60-62.

160 **L67:** OMIP acronym has already been defined.

161 **L70:** CMIP acronym has already been defined.

162 We thank the reviewer for spotting that. We made sure in the revised manuscript that the  
163 OMIP and CMIP acronyms are defined only once.

164

## 165 1. Data

166 **Table 1:** The ocean resolution column is not a resolution but a number of points. What are  
167 the criteria that make you choose these specific models? Are these all available models with  
168 a resolution lower or equal to  $1^\circ \times 1^\circ$ ? Why did you choose an unequal number of models  
169 between OMIP1 and OMIP2? I notice that some of the models are identical between the two  
170 phases 0-9, 2-10, 4-11, and 5-12. Why can't you use the same model ensemble for both  
171 phases?

172 We have added in the caption that what is indicated in Table 1 of the revised manuscript is  
173 not the resolution but the number of grid points in the longitudinal, latitudinal and vertical  
174 dimensions.

175 As indicated in the submitted manuscript L122, only the models with a resolution finer than  
176  $1^\circ$  by  $1^\circ$  are considered. However, we understand that the sentence is not precise enough,  
177 therefore we have rephrased it as follows: "All ocean models with a resolution finer than  $1^\circ$   
178 by  $1^\circ$  and having all the variables needed for this study are listed in Table 1". L103-104 We  
179 realized that we were missing one model output that fits our criteria, MIROC6, which is now  
180 included in the OMIP1 and OMIP2 ensembles.

181 We could have used the same model ensemble for both phases, but we have decided to use  
182 the maximum number of models available. Considering only the model pairs would be  
183 interesting but it would be a limited subset of the total model data.



184 **L119:** The 55km zonal resolution is only the resolution at the equator.

185 We thank the reviewer for the precision, we have added: “at the equator” in the revised  
186 manuscript L100.

187 L129: What is the criterium to choose 18 CMIP6 models?

188 The choice of these 18 CMIP6 models was not based on any particular criterium. In the revised  
189 version we consider now all CMIP6 models available (55 models) on [https://esgf-](https://esgf-data.dkrz.de/search/cmip6-dkrz/)  
190 [data.dkrz.de/search/cmip6-dkrz/](https://esgf-data.dkrz.de/search/cmip6-dkrz/) having the variable TOS over the historical period from the  
191 variant r1i1p1f1. Table S1 has been updated accordingly.

192 **L130:** What is rli1p1f1?

193 R1i1p1f1 is the variant reference. CMIP6 netCDF file metadata includes the variant-id global  
194 attribute which has the format r1i1p1f1, where the numbers are indices for particular  
195 configurations of:

- 196 • r: realisation (i.e. ensemble member)
- 197 • i: initialisation method
- 198 • p: physics
- 199 • f: forcing

200

201 More information can be found at: [https://docs.google.com/document/d/1h0r8RZr\\_f3-](https://docs.google.com/document/d/1h0r8RZr_f3-8egBMMh7aqLwy3snpD6_MrDz1q8n5XUk/edit?usp=sharing)  
202 [8egBMMh7aqLwy3snpD6\\_MrDz1q8n5XUk/edit?usp=sharing](https://docs.google.com/document/d/1h0r8RZr_f3-8egBMMh7aqLwy3snpD6_MrDz1q8n5XUk/edit?usp=sharing)

203

204 **L133:** Add modeling to “We conducted several experiments”.

205 “Modelling” has been added in L114.

206 **L134:** What does z\* mean?

207  $z^*$  is the rescaled geopotential coordinate used by the model MOM for representing the free-  
208 surface (Adcroft and Campi, 2004; Griffies et al., 2016). For the large scale,  $z^*$  surfaces differ  
209 slightly from constant geopotential surfaces  $z$ . We have modified the sentence L114-116.

210 Griffies, S. M., Danabasoglu, G., Durack, P. J., Adcroft, A. J., Balaji, V., Böning, C. W.,  
211 Chassignet, E. P., Curchitser, E., Deshayes, J., Drange, H., Fox-Kemper, B., Gleckler, P. J.,  
212 Gregory, J. M., Haak, H., Hallberg, R. W., Heimbach, P., Hewitt, H. T., Holland, D. M., Ilyina, T.,  
213 Jungclaus, J. H., Komuro, Y., Krasting, J. P., Large, W. G., Marsland, S. J., Masina, S., McDougall,  
214 T. J., Nurser, A. J. G., Orr, J. C., Pirani, A., Qiao, F., Stouffer, R. J., Taylor, K. E., Treguier, A. M.,  
215 Tsujino, H., Uotila, P., Valdivieso, M., Wang, Q., Winton, M., and Yeager, S. G.: OMIP  
216 contribution to CMIP6: experimental and diagnostic protocol for the physical component of  
217 the Ocean Model Intercomparison Project, *Geoscientific Model Development*, 9, 3231–3296,  
218 <https://doi.org/10.5194/gmd-9-3231-2016>, 2016.

219  
220 Alistair Adcroft, Jean-Michel Campin: Rescaled height coordinates for accurate  
221 representation of free-surface flows in ocean circulation models, *Ocean Modelling*, Volume  
222 7, Issues 3–4, 2004, Pages 269-284, ISSN 1463-5003,  
223 <https://doi.org/10.1016/j.ocemod.2003.09.003>.

224

225 **L136:** What does nominal mean?

226 We have removed “nominal” from the sentence.

227 **L140:** What is the bulk formula used for the estimation of momentum/heat/freshwater  
228 fluxes? What about the rivers, is there a relaxation to climatological SSS or runoffs?

229 Following the OMIP-CORE-II experimental protocol, our simulations make use of the Large  
230 and Yeager (2009) bulk formulae for computing turbulent fluxes. There is no restoring term  
231 applied to SST. A weak restoring to a monthly observational-based climatology is applied to  
232 sea surface salinity, as for all OMIP simulations, with a piston velocity of 50m/300d.

233 Large, W. G. and Yeager, S. G.: The global climatology of an interannually varying air–sea flux  
234 data set, *Climate Dynamics*, 33, 341–364, <https://doi.org/10.1007/s00382-008-0441-3>, 2009.

235 **L142:** Specify where the 10m-winds are used in the surface forcing estimation (wind stress,  
236 latent and sensible heat, evaporation).

237 In both OMIP1 and OMIP2 (see Large and Yeager, 2009; Griffies et al., 2009; Griffies et al.  
238 2016), bulk formulae parameterize the turbulent fluxes of momentum, heat (sensible and  
239 latent), and moisture (evaporation) in terms of the near surface atmospheric state which  
240 includes the 10m winds. In the revised manuscript, when describing the new sensitivity  
241 experiment MOM5-LR-anom, we now clearly specify that the anomalous winds have an  
242 impact on all surface fluxes forcing the ocean. L126-130

243 Griffies, S. M., Biastoch, A., Böning, C., Bryan, F., Danabasoglu, G., Chassignet, E. P., England,  
244 M. H., Gerdes, R., Haak, H., Hallberg, R. W., Hazeleger, W., Jungclaus, J., Large, W. G., Madec,  
245 G., Pirani, A., Samuels, B. L., Scheinert, M., Gupta, A. S., Severijns, C. A., Simmons, H. L.,  
246 Treguier, A. M., Winton, M., Yeager, S., and Yin, J.: Coordinated Ocean-ice Reference  
247 Experiments (COREs), *Ocean Modelling*, 26, 1–46,  
248 <https://doi.org/https://doi.org/10.1016/j.ocemod.2008.08.007>, 2009.

249

250 **L147:** Specify if the prescribed longwave is the longwave\_in or the sum of longwave\_in and  
251 longwave\_out (that depends on SST\*\*4).

252 Following both OMIP1 and OMIP2 protocols, the net surface longwave solar QL is computed  
253 from the downwelling longwave flux QA from the atmospheric state minus the blackbody  
254 radiation from the ocean back to the atmosphere, which depends on SST\*\*4 (Large and  
255 Yeager, 2008; Griffies et al., 2009). Given that we have now removed the discussion on the  
256 experiment MOM5-LR-heat and that the specifications of air-sea fluxes are part of the OMIP  
257 protocol detailed in both Griffies et al. (2009) and Griffies et al. (2016), we have opted for not  
258 adding this information in the revised manuscript.

259

260 **L163:** Is this potential density?

261 Yes, it is potential density. We have added 'potential' to the sentence L149.

262 **L167:** What is the expected influence of a change in the thermocline tilt? Modal dispersion?

263 One could expect that with a greater thermocline tilt, the interannual SST variability in the  
264 eastern equatorial Atlantic would be larger. Cai and Cowan (2013) showed for the Indian  
265 Ocean dipole, using CMIP3 and CMIP5 models, that for a given wind anomaly, a greater  
266 thermocline slope results in a stronger thermocline response, inducing a greater SST anomaly  
267 in the eastern Indian ocean, than a weaker thermocline slope. They found that models with  
268 greater climatological thermocline slope exhibit stronger thermocline feedback. However, as  
269 discussed in this study, we find no relationship between the climatological thermocline tilt  
270 and the interannual SST variability in the eastern equatorial Atlantic using the OMIP1 and  
271 OMIP2 ensembles.

272 Cai, W., and T. Cowan (2013), Why is the amplitude of the Indian Ocean Dipole overly large in  
273 CMIP3 and CMIP5 climate models? *Geophys. Res. Lett.*, 40, 1200–1205,  
274 doi:10.1002/grl.50208.

275 L170: The feedbacks could be explained in the introduction, along with the impacts of changes  
276 in certain components.

277 We have explained the different Bjerknes feedback components in the introduction L36-42,  
278 but we kept the section 2.2.3 because we explain in that section that the different  
279 components are obtained by linear regressions done in particular seasons and with particular  
280 indexes.

### 281 1. Comparison of the monthly climatologies

282 **L177:** See my general comment on the definition of seasonal cycle vs. monthly climatology.  
283 Also introduce this section, because it is not obvious to all readers why it is important to  
284 evaluate the realism of the ocean mean state and its seasonal variations and what are the  
285 implications of biases on the interannual variability.

286 We have now indicated at the beginning of this section the following: “Accurately simulating  
287 the equatorial Atlantic wind, SLA and SST monthly climatologies in ocean models is crucial for  
288 the good representation of the EEA interannual SST variability (Prodhomme et al., 2019).”  
289 L163-164

290 **L185:** The seasonal cycle of SLA is driven by resonance modes (Brandt et al., 2016) associated  
291 with baroclinic modes 2 (at semiannual frequency) and 4 (at annual frequency).

292 Brandt, P., Claus, M., Greatbatch, R. J., Kopte, R., Toole, J. M., Johns, W. E., and Böning, C. W.:  
293 Annual and semiannual cycle of equatorial Atlantic circulation associated with basin-mode  
294 resonance, *J. Phys. Oceanogr.*, 46, 3011–3029, <https://doi.org/10.1175/Jpo-D-15-0248.1>,  
295 2016.

296 We thank the reviewer for the precision. We have now added this reference along with a  
297 sentence to the revised manuscript. L178-179

298 **L195:** Can you comment on the eastern part of the basin, which is more important for the  
299 Bjerknes feedbacks.

300 Following the reviewer’s suggestion, we have now added the ATL3-averaged SLA in JJA for  
301 ORA-S5, OMIP1, and OMIP2 ensemble means in the paragraph and in Table 2 of the revised  
302 manuscript. L184-188

303 L214: What about the stratification (you could use the 24°C isotherm for the calculation).

304 We are not sure what the reviewer is suggesting with the 24°C isotherm. We agree with the  
305 reviewer that computing the stratification for each OMIP model could be interesting to  
306 compare, however, we believe that it would not provide more insight than the vertical  
307 temperature gradient. In addition, it would require to download the salinity field which  
308 represents a lot of data.

309 **L198-233:** Summarize all the estimated values in a table. The text is too technical to grasp the  
310 main message.

311 We have now included a table at the end of this section (Table 2 of the revised manuscript)  
312 to summarize all values. We have also modified the text to read better.

313 **Figure 3:** On the right, you should add 3 curves for ATL4 or ATL3 averaged values. The y-axis  
314 labels should be centered between ticks positioned at the beginning and end of the month.  
315 Currently, half a month is missing at the beginning of January and half a month is missing at  
316 the end of December. Furthermore, the figure caption can be reduced. Sentences are too  
317 repetitive.

318 As proposed by the reviewer, we have added on the right side of the revised Figures 2 and 4,  
319 3 curves for ATL4 or ATL3 averaged values. We have also centered the y-axis ticks on the 15<sup>th</sup>  
320 of the month and the figure caption has been reduced.

321 **Figure 4:** For a better comparison, can you align subplot a) with subplots c) and g), and align  
322 subplot b), with subplots e) and i). Can you plot ORAS5 vertical velocity?

323 As suggested by the reviewer, all subfigures in the revised Figure 3 are aligned. Unfortunately,  
324 ORA-S5 does not provide the vertical velocity, this is why it has not been plotted. In order to  
325 align the plots and because the vertical velocity from ORA-S5 is missing, we have decided to  
326 remove the subpanels (d, f, h, j) from Figure 3 of the revised manuscript.

### 327 1. Comparison of the interannual variability

328 **L254:** Imbol Koungue et al (2017) is not an appropriate reference, this study is not about  
329 equatorial waves as it focuses on Benguela Niño/Niña events.

330 We have replaced this reference with Illig et al., (2004). L234-235

331 Illig, S., B. Dewitte, N. Ayoub, Y. du Penhoat, G. Reverdin, P. De Mey, F. Bonjean, and G. S. E.  
332 Lagerloef (2004), Interannual long equatorial waves in the tropical Atlantic from a high-  
333 resolution ocean general circulation model experiment in 1981–2000, *J. Geophys. Res.*, 109,  
334 C02022, doi:[10.1029/2003JC001771](https://doi.org/10.1029/2003JC001771).

335 **L259:** Why don't you compare OMIPs to ORAS5.

336 We have modified the sentence to: “The interannual SSH variability in the ATL3 region is too  
337 strong (weak) in the OMIP1 (OMIP2) ensemble mean compared to ORA-S5 (Figure 4f, g, h). In  
338 numbers, the OMIP1 (OMIP2) ensemble mean ATL3-averaged SSH variability in MJJ is  $0.02 \pm$   
339  $0.002$  m ( $0.015 \pm 0.002$  m), while it is  $0.019$  m in ORA-S5 (Figure 4h).” L240-242

340 **Figure 5:** On the right, you should add 3 curves for ATL4 or ATL3 averaged values. Caption:  
341 What do the horizontal lines highlight? Specify that vertical lines denote the ATL4/ATL3  
342 regions. The caption could be drastically reduced: “Same as Figure 3 but for the monthly  
343 climatological standard deviation of interannual anomalies.”

344 As proposed by the reviewer, we have added on the right side of the figure the 3 curves for  
345 ATL4 or ATL3 averaged values. We have reduced the caption as suggested by the reviewer  
346 and indicated what are the different vertical and horizontal lines.

347 **Figure 6:** Does BF1 have some meaning in the case of a forced simulation?

348 We thank for the reviewer for raising this point. Indeed, the western equatorial Atlantic zonal  
349 wind response to an SST anomaly in the eastern equatorial Atlantic cannot be observed in a  
350 forced ocean simulation. Therefore, we have removed the BF1 from Figure 5 of the revised  
351 manuscript. We have added to the text the following: “The first component of the Bjerknes  
352 feedback is not discussed as in a forced ocean model simulation there is no response of the  
353 western equatorial Atlantic winds to an SST anomaly in the eastern equatorial Atlantic.” L270-  
354 272.

355 **L270:** Mention (here or in the introduction) that the peaks of variability correspond to the  
356 classical Atlantic Niños/Niña events phase-locked to boreal spring/summer and the Atlantic  
357 Niño II in November-December (Okumura and Xie, 2006).

358 Okumura, Y., and S. Xie, 2006: Some Overlooked Features of Tropical Atlantic Climate Leading  
359 to a New Niño-Like Phenomenon. J. Climate, 19, 5859–5874,  
360 <https://doi.org/10.1175/JCLI3928.1>.

361 We have added this reference along with a sentence to the introduction. L30-32

362 **L279:** Replace the word disparities with biases.

363 We have replaced the word “disparities” with “biases” as proposed by the reviewer. L261-  
364 262

365 **L300:** I guess that the plus/minus 10 meters has been chosen quite arbitrarily?

366 Yes, the plus/minus 10 meters has been chosen arbitrarily as it encompasses the high  
367 interannual temperature variability around the thermocline.

368 **L302:** How does the thermocline depth influence the MLD. The MLD is controlled by  
369 momentum stress, isn't it?

370 We apologize for the confusion, the verb “influence” was badly chosen. What is meant is that  
371 subsurface temperature anomalies at the thermocline level in the western equatorial Atlantic  
372 are too deep to reach the MLD and hence they would not impact the temperature in the MLD.  
373 L284-285

374 **L303:** The thermocline is not that close to the MLD, maybe the word “closer” is better here.

375 We agree with the reviewer and have replaced “close” by “closer”. L286

376 **L307-L310:** Quantify by how much the subsurface temperature anomalies have been reduced  
377 compared to ORAS5 (or from OMIP1 to OMIP2).

378 The subsurface temperature variability in MJJ in the ATL3 averaged between  $\pm 10$  m around  
379 the thermocline is of  $1.28$  °C for ORA-S5,  $0.78 \pm 0.06$  °C for the OMIP1 ensemble mean and  
380  $0.58 \pm 0.07$  °C for the OMIP2 ensemble mean. Hence, relative to OMIP2, the equatorial  
381 Atlantic Ocean interannual temperature variability in MJJ in the OMIP1 ensemble mean is  
382 about 34% larger. L290-292 and L299-302.

383  $(0.78 - 0.58)/0.58 \cong 0.345\%$ .

384 **Figure 7:** On top of each panel, you could plot the interannual SSH variability (STD), which  
385 should mirror the subsurface temperature variability.



386 As proposed by the reviewer, we have added the interannual SSH variability in MJJ on top of  
387 each equatorial Atlantic temperature variability section in MJJ of the revised Figures 6 and 7.  
388 As expected, the interannual SSH variability mirrors the subsurface temperature variability.

#### 389 1. Sensitivity tests on the wind forcing

390 **L328-329:** In forced ocean models/simulations, the surface forcing controls the mean state,  
391 the seasonal cycle, and the variability. This statement is quite empty here (same as question  
392 3 at the end of the introduction). What could be important to test is the effect of the forcing  
393 away from the Atlantic equatorial band as opposed to the local equatorial forcing.

394 We have removed this statement from the manuscript: “This underscores the sensitivity of  
395 the simulation of the tropical Atlantic interannual variability to surface forcings.” We agree  
396 with the reviewer that testing the effect of the forcing away from the equatorial Atlantic band  
397 as opposed to the local equatorial forcing could be very interesting, however, we believe that  
398 it would fit better in a separate study.

399 **L334-351:** I do not see the purpose of comparing CORE-II and JRA55-do to other surface wind  
400 products. Can you please introduce this paragraph with your objectives?

401 The main objective of this paragraph is to show that quite some uncertainty exists among the  
402 atmospheric reanalysis products. We have removed this paragraph from the manuscript and  
403 included it into the supplementary material Text S3.

404 **L351:** Have these simulations/model configurations been validated?

405 We have added a validation of the mean-state, monthly climatology and interannual  
406 variability of the MOM5-LR and MOM5-HR simulations relative to ORA-S5 and we have  
407 compared MOM5-LR-anom to MOM5-LR. This can be found in the supplementary material  
408 Text S1.

409 **L352:** I do not get the implication of the “consequently”.

410 We have removed “consequently” in the revised manuscript.

411 **L372:** “We have demonstrated” is a very strong statement. In the equatorial Atlantic, the  
412 ocean dynamics is mostly linear (see work by P. Brandt, S. Illig, or others), so there is no  
413 surprise here. That is why the shift of one month in the wind forcing causes the shift of one  
414 month in SSH variability (Line 366-368).

415 We agree with the reviewer that “We have demonstrated” is a too strong statement. We have  
416 replaced “demonstrated” by “shown” in the revised manuscript L338.

417 **Figure 9:** The subplots c) and d) are mistakenly referred to as a) and b).

418 We thank the reviewer for spotting this typo. It has been corrected in the revised manuscript.

419 **Figure 10:** On the right side of the plot, you should add ATL3 curves for both SSH (top panels)  
420 and SST (bottom panels).

421 As proposed by the reviewer, we have added on the right side of the revised figure the ATL3-  
422 averaged curves for both SSH and SST.

#### 423 1. **Conclusion and Discussion:**

424 **L389-391:** this statement seems out of context.

425 This statement has been removed in the revised manuscript.

426 **L394-396:** This can be proven with model experiments (see my general comment).

427 Please see our response above relative to the introduction of a new sensitivity experiment  
428 MOM5-LR-anom.

429 **L407:** This can be associated with the estimation of the drag coefficient.

430 It is true that transfer coefficients for drag, sensible heat transfer and evaporation they all  
431 have a dependency to the momentum flux. For this reason, the larger wind stress variability  
432 in OMIP1 may play a dominant role in the strengthened SST variability in the ATL3 region.  
433 Given that we have not investigated this aspect more in detail we prefer to leave this  
434 statement as a suggestion.

435 **L424:** The fact that models in OMIP1 and OMIP2 use the same model physics should be said  
436 in section 2.1.2. This echoes with my previous question: why do you use different models for  
437 OMIP1 and OMIP2 ensemble means?

438 We have added a sentence in section 2.1.2 indicating that models participating in both OMIPs  
439 use the same model physics. See also our response above regarding the choice of different  
440 OMIP1 and OMIP2 models.

441 **L425:** see my general comment.

442 Please see our related responses above.

443 **Figure 11:** The point associated with MOM-LR-winds could be blue because it is closer to  
444 OMIP1 protocol (shown with blue numbers).

445 We have changed the color for OMIP1 and OMIP2 models which are now in black and blue,  
446 respectively. Because MOM5-LR is a OMIP2-like simulation and MOM5-LR-anom is a OMIP1-  
447 like simulation we put them in blue and black in Figure 9 of the revised manuscript.

448
