# Supplementary material for: An assessment of equatorial Atlantic interannual variability in OMIP simulations
Source: Copernicus journal article supplement (doi:10.5194/egusphere-2024-134), 2024-01-18
Supplement: Supplementary file [file egusphere-2024-134-AC2-supplement.pdf]

1 **Response to reviewers' comments for "An assessment of equatorial Atlantic**  
2 **interannual variability in OMIP simulations".**

3 We thank the reviewer for their comments and suggestions that helped to improve the  
4 manuscript. Please find our detailed responses below. The reviewer comments are in black  
5 and our answers in blue. **When line numbers are given, they refer to the revised manuscript**  
6 **with track changes accepted.**

7 This study compares tropical Atlantic variability among forced ocean simulations (CORE-I and  
8 CORE-II) and a subset of CMIP6 models and identifies a diffusive thermocline bias among  
9 models.

10 My primary concern with this study is that the model representation is biased towards  
11 Eulerian vertical coordinate models such as MOM5 . NorESM is the only isopycnal coordinate  
12 configuration , however it is using a high background vertical diffusivity ( nominally  $1-1.5e-5$   
13  $m^2 s^{-1}$ ). Near-equatorial background levels are reduced in several CMIP configurations,  
14 notably NOAA/GFDL-CM2G (<https://doi.org/10.1175/2008JPO3708.1>) ,which is a quasi-  
15 Isopycnal coordinate model, similar to NorESM.

16 We agree with the reviewer that the study is biased towards Eulerian vertical coordinate  
17 models. However, we have used all available models participating to OMIP phases 1 and 2  
18 with a resolution higher than  $1^\circ$  by  $1^\circ$  and presenting all the variables needed for our analysis  
19 (L102-103). The NOAA/GFDL-CM2G is a coupled model and therefore is not participating to  
20 the Ocean Model intercomparison Project.

21 Echoing the reviewer's concern, we believe that diversity among ocean models should be  
22 encouraged, whereas we observe instead a global convergence towards a handful of global  
23 ocean models, often using similar numerical approaches and parameterizations. Hence, more  
24 isopycnal coordinate models, or models using generalized vertical coordinates and the  
25 vertical Lagrangian-remap method (Griffies et al., 2020), contributing to OMIPs and CMIPs  
26 would be beneficial for both model development and assessment.

27 We have added a note on this topic in the Discussion section (L400-405).

28 Griffies, S. M., Adcroft, A., & Hallberg, R. W. (2020). A primer on the vertical Lagrangian-  
29 remap method in ocean models based on finite volume generalized vertical  
30 coordinates. *Journal of Advances in Modeling Earth Systems*, 12,  
31 e2019MS001954. <https://doi.org/10.1029/2019MS001954>

32

33 Model sensitivity results suggest that increasing model resolution slightly reduces the diffuse  
34 thermocline bias (MOM5-HR). This is not discussed further and deserves further attention.  
35 Would an implication be that additional high resolution studies are needed to assess to what  
36 degree stratification bias can be reduced by increasing horizontal resolution? To what extent  
37 could improved representation result from numerics (e.g. Lagrangian coordinate  
38 models)? Including an isopycnal with low equatorial diffusivities (CM2G) would help to  
39 address this question.

40 We agree with the reviewer that this topic deserves more attention. As mentioned in the  
41 manuscript, we have 3 model pairs ACCESS-OM2 and ACCESS-OM2-025, MOM5-LR and  
42 MOM5-HR, as well as CMCC-CM2-HR4 and CMCC-CM2-SR5 which have the same number of  
43 vertical levels but they differ in their horizontal resolution, going from coarse ( $1^{\circ}\times 1^{\circ}$ ) to  
44 refined ( $0.25^{\circ}\times 0.25^{\circ}$ ). This comparison, based only on three model pairs, suggests that  
45 increasing the ocean horizontal resolution does not lead to consistent changes in the  
46 equatorial Atlantic mean-state and interannual SST variability in boreal summer (Figure 9 of  
47 the revised manuscript). One notable change is the increase of the vertical ocean temperature  
48 gradient and subsurface temperature variability in boreal summer when comparing MOM5-  
49 LR to MOM5-HR. However, this change is not observed in the other two model pairs. A larger  
50 number of model pairs would be required to properly assess the impact of resolution. (L393-  
51 400)

52 Furthermore, Zhang et al., (2022) investigated the impact of the wind forcing and ocean  
53 vertical mixing parametrization on the tropical Atlantic subsurface ocean temperature bias in  
54 the tropical Atlantic using sensitivity experiments made with the POP2 model. They found  
55 that the wind forcing has only a marginal effect on the subsurface temperature bias in the

56 tropical Atlantic. However, they showed that the overestimated vertical mixing in OGCMs play  
57 a major role in the formation of subsurface warm biases in the tropical Atlantic.

58 As mentioned above, comparing Eulerian versus Lagrangian coordinate models would help to  
59 shed light on this aspect, but it is not presently feasible with the available OMIP simulations.

60 Zhang, Q., Y. Zhu, and R. Zhang, 2022: Subsurface Warm Biases in the Tropical Atlantic and  
61 Their Attributions to the Role of Wind Forcing and Ocean Vertical Mixing. *J. Climate*, **35**, 2291–  
62 2303, <https://doi.org/10.1175/JCLI-D-21-0779.1>.

63 Figure quality is good. In Figures 3 and 4 (and perhaps 5), it would be helpful to show  
64 anomalies for all fields, with respect to ORA-S5.

65 We thank the reviewer for the appreciation of our figures. In the revised manuscript, we do  
66 not show the anomalies for all fields with respect to ORA-S5, as we think it is important for  
67 readers to properly see the phasing of each variable. Nonetheless, we have added, as  
68 suggested by reviewer 1, the ATL3 or ATL4 indexes for each variable in Figures 2, 4, and 8 of  
69 the revised manuscript, allowing for direct comparison. In addition, supplementary Text S1 is  
70 devoted to the comparison of the MOM5 model runs, MOM5-LR and MOM5-HR, to ORA-S5.

71 Did the authors consider analyzing mean and time-varying contributions to the upwelling heat  
72 budget, i.e. how much of the variability is related to changes in the background  
73 stratification/upwelling versus eddy contributions? This could be helpful for the discussion,  
74 however, the existing figures reasonably convey the point of the dominance of vertical  
75 processes in this region.

76 We thank the reviewer for the suggestion. A comprehensive heat budget analysis will be  
77 performed in a future study using only one model at varying resolution, and performing  
78 multiple sensitivity runs to investigate the role of the background stratification on the  
79 variability of the equatorial Atlantic.
